# Supplementary material
Source: PubMed Central journal article supplement (PMC5103857)

**A**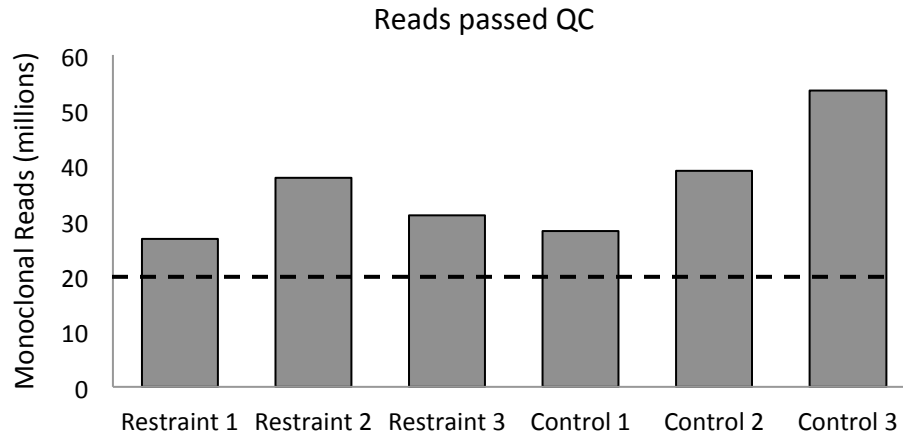**B**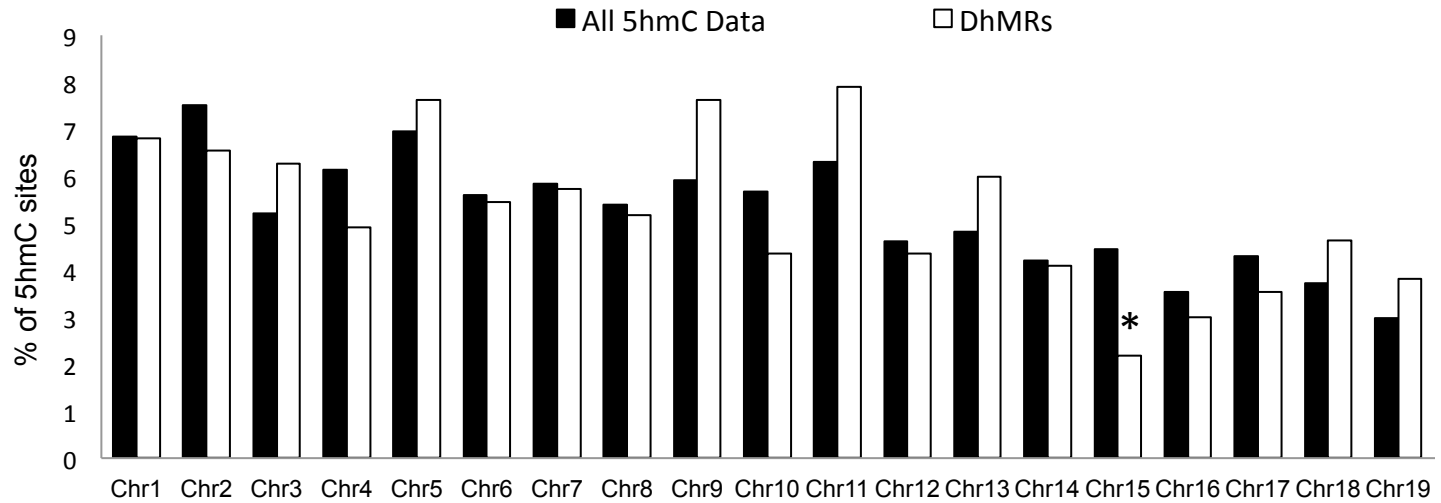

Supplement: NIHMS815477-supplement-17.pdf [file NIHMS815477-supplement-17.pdf]

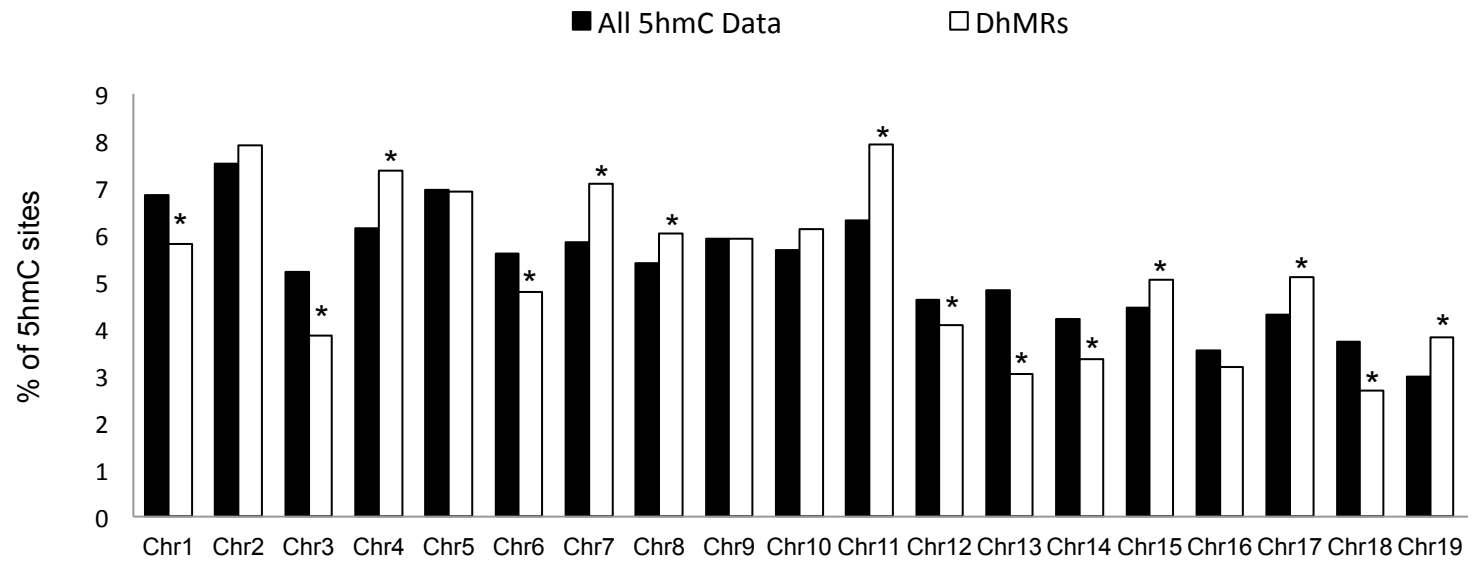

Supplement: NIHMS815477-supplement-18.pdf [file NIHMS815477-supplement-18.pdf]

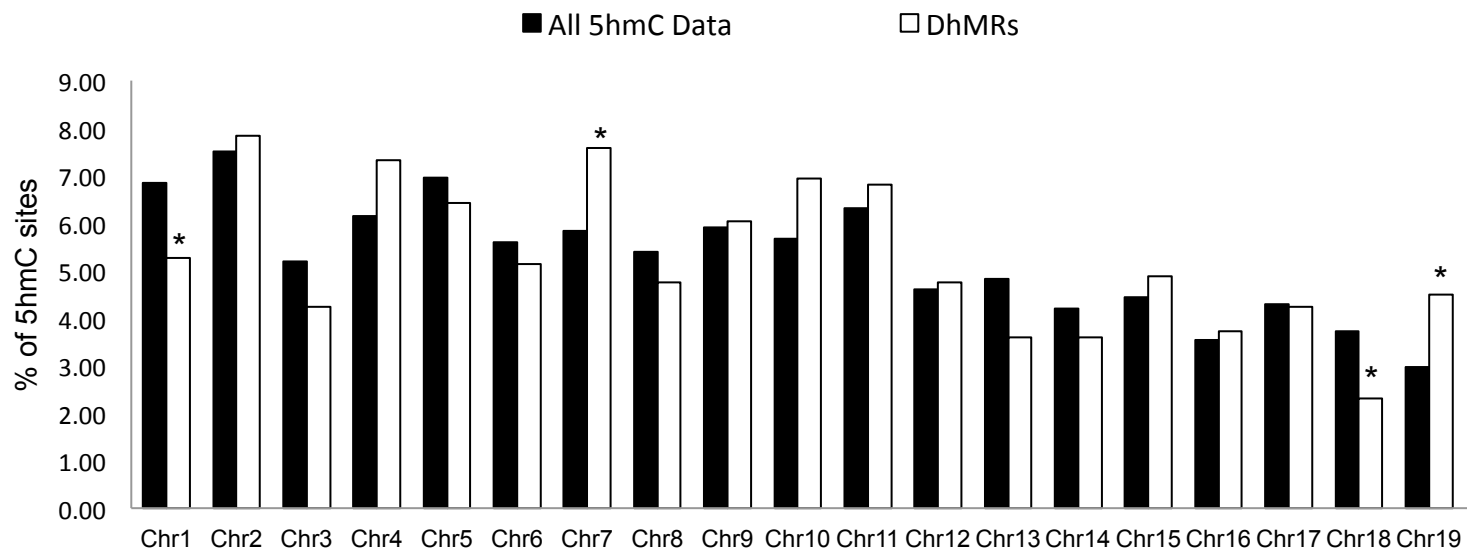

Supplement: NIHMS815477-supplement-19.pdf [file NIHMS815477-supplement-19.pdf]
